# Supplementary material for: Inflammatory Macrophage-derived Plasminogen Activator Inhibitor-1 Exacerbates Inflammation through Efferocytosis Inhibition
Source: Research Square preprint supplement (doi:10.21203/rs.3.rs-7305973/v1), 2025-08-13
Supplement: Supplementary file 1 [file 476a20db36fb25d5d083971c.docx]

**Supplementary Table S1**

| **Reagent or Resource** | **Manufacturer** | **Identifier** |
| --- | --- | --- |
| **Antibodies** | | |
| Rabbit anti-PAI-1 | Abcam, Cambridge, UK | Cat#ab66705 |
| PE anti-mouse Ly6C | Biolegend, San Diego, CA, USA | Cat#128008; clone HK1.4 |
| PE/Cy7 anti-mouse Ly6C | Biolegend, San Diego, CA, USA | Cat#128018; clone HK1.4 |
| Rabbit anti-Laminin | Abcam, Cambridge, UK | Cat#ab11575 |
| Biotin anti-mouse Ly6G | Biolegend, San Diego, CA, USA | Cat#127604; clone 1A8 |
| PE anti-mouse CD192 (CCR2) | Biolegend, San Diego, CA, USA | Cat#150610; clone SA203G11 |
| TruStain FcXTM PLUS (anti-mouse CD16/32) | Biolegend, San Diego, CA, USA | Cat#156604; clone S17011E |
| APC/Cyanine7 anti-mouse CD45 | Biolegend, San Diego, CA, USA | Cat#103116; clone 30-F11 |
| Brilliant Violet 421TM anti-mouse CD11b | Biolegend, San Diego, CA, USA | Cat#101236; clone M1/70 |
| FITC anti-mouse Ly6G | Biolegend, San Diego, CA, USA | Cat#127606; clone 1A8 |
| FITC anti-mouse NK1.1 | Biolegend, San Diego, CA, USA | Cat#108706; clone PK136 |
| FITC anti-mouse/human CD45R/B220 | Biolegend, San Diego, CA, USA | Cat#103206; clone RA3-6B2 |
| FITC anti-mouse CD3ε | Biolegend, San Diego, CA, USA | Cat#100306; clone 145-2C11 |
| FITC anti-mouse CD170 (Siglec F) | Biolegend, San Diego, CA, USA | Cat#155504; clone S17007L |
| Alexa Flour 700TM anti-mouse F4/80 | Biolegend, San Diego, CA, USA | Cat#123130; clone BM8 |
| APC anti-mouse MHC class II | Biolegend, San Diego, CA, USA | Cat#107614; clone M5/114.15.2 |
| PE/Cy7 Annexin V | Biolegend, San Diego, CA, USA | Cat#640950 |
| Rabbit anti-LRP1 | Abcam, Cambridge, UK | Cat#ab92544; clone EPR3724 |
| Rabbit anti-Calreticulin (CRT) ER Marker | Abcam, Cambridge, UK | Cat#ab2907 |
| Cyanine5 Streptavidin | Biolegend, San Diego, CA, USA | Cat#405209 |
| PE Donkey anti-Rabbit IgG | Biolegend, San Diego, CA, USA | Cat#406421; clone Poly4064 |
| FITC Donkey anti-Rabbit IgG | Biolegend, San Diego, CA, USA | Cat#406403; clone Poly4064 |
| Alexa Fluor®488 goat anti rabbit IgG | ThermoFisher Scientific | A-11008 |
| Alexa Fluor®594 anti rabbit IgG | ThermoFisher Scientific | A-11012 |
| **Chemicals, peptides and recombinant proteins** | | |
| RPMI-1640 | FujiFilm Wako Pure Chemical, Osaka, Japan | Cat#189-02025 |
| Fetal Bovine Serum (FBS) | Biosera, Cholet, France | Cat#FB-1003/500  South Africa Origin |
| L-glutamine | FujiFilm Wako Pure Chemical, Osaka, Japan | Cat#073-05391 |
| Penicillin-Streptomycin | FujiFilm Wako Pure Chemical, Osaka, Japan | Cat#168-23191 |
| Tamoxifen | Sigma Aldrich, Saint Louis, MO, USA | Cat#T5648 |
| Corn oil | FujiFilm Wako Pure Chemical, Osaka, Japan | Cat#032-17016 |
| Cardiotoxin | Latoxan, Valence, France | Cat#L8102 |
| Evan Blue Dye | FujiFilm Wako Pure Chemical, Osaka, Japan | Cat#056-04061 |
| Collagenase Type-I | FujiFilm Wako Pure Chemical, Osaka, Japan | Cat#037-17603 |
| DNase I, grade II | Roche, Basel, Switzerland | Cat#10104159001 |
| ISOGEN II | Nippon Gene, Tokyo, Japan | Cat#311-07361 |
| Cytofix/CytopermTM Fixation/Permeabilization Kit | BD Bioscience Franklin Lakes, NJ, USA | Cat#554714 |
| Dulbecco’s Phosphate buffer saline (PBS) | KAC, Hyogo, Japan | Cat#DSBN200 |
| 0.5 M Ethylenediaminetetraacetic acid (EDTA) buffer (pH 8.0) | Nippon Gene, Tokyo, Japan | Cat#311-90075 |
| 30 w/v% Bovine Serum Albumin (BSA) | FujiFilm Wako Pure Chemical, Osaka, Japan | Cat#017-22231 |
| Monocyte Isolation Kit (BM), mouse | Miltenyi Biotec, Bergisch Gladbach, Germany | Cat#130-100-629 |
| LS Columns | Miltenyi Biotec, Bergisch Gladbach, Germany | Cat#130-042-401 |
| Staurosporine | FujiFilm Wako Pure Chemical, Osaka, Japan | Cat#197-10251 |
| PrimeScriptTM RT-PCR kit | Takara Bio, Shiga, Japan | Cat#RR014A |
| TaqManTM Fast Advanced Master Mix | Thermo Fisher Scientific, Waltham, MA, USA | Cat#4444557 |
| SlowFadeTM Gold Antifade Mountant with DAPI | Thermo Fisher Scientific, Waltham, MA, USA | Cat#S36938 |
| CellTraceTM Yellow Cell Proliferation Kit | Thermo Fisher Scientific, Waltham, MA, USA | Cat#C34567 |
| CellTraceTM CFSE Cell Proliferation Kit | Thermo Fisher Scientific, Waltham, MA, USA | Cat#C34554 |
| Human Receptor Associated Protein (RAP), Low Endotoxin | Melocular Innovation, Novi, MI, USA | Cat#RAP-LE |
| Tetramethhylrhodamine (TRITC) -Dextran 2,000 kDa | Thermo Fisher Scientific, Waltham, MA, USA | Cat#D7139 |
| NHS-Fluorescein | Thermo Fisher Scientific, Waltham, MA, USA | Cat#46409 |
| Recombinant human Serpin E1 (PAI-1) protein | Biolegend, San Diego, CA, USA | Cat#753804 |
| Recombinant human calreticulin (CRT) protein | Abcam, Cambridge, UK | Cat#ab91577 |
| **Cell line** | | |
| J774.1 | RIKEN Cell Bank, Ibaraki, Japan | Cat#RCB0434 (TKG0208); RRID:CVCL_4770 |
| **Mice** | | |
| C57BL/6J | CLEA Japan, Tokyo, Japan | N/A |
| PAI-1-knockout (B6.129S2-Serpine1tm1Mlg/J) | The Jackson Laboratory, Bar Harbor, ME, USA | RRID:IMSR_JAX:002507 |
| CCR2-CreER-GFP [C57BL/6-Ccr2em1(icre/ERT2)Peng/J] | The Jackson Laboratory, Bar Harbor, ME, USA | RRID:IMSR_JAX:035229 |
| PAI-1-floxed [C57BL/6-PAI-1flox/flox] | This paper |  |
| **Software** | | |
| FlowJo version 10.10 | FlowJo, LLC, Ashland, OR, USA | https://flowjo.com/flowjo/download |
| GraphPad Prism 10.2 | GraphPad Software, La Jolla, CA, USA | https://www.graphpad.com/features |
